# Supplementary material for: Investigation on voltage loss in organic triplet photovoltaic devices based on Ir complexes
Source: Royal Society of Chemistry journal article supplement (doi:10.1039/c9tc04914b), 2019-01-01
Supplement: c9tc04914b1.pdf [file c9tc04914b1.pdf]

## Supporting information

### Investigation on voltage loss in organic triplet photovoltaic devices based on Ir complexes

Yingzhi Jin, ‡<sup>a</sup> Jie Xue, ‡<sup>b</sup> Juan Qiao,<sup>\*b</sup> Fengling Zhang,<sup>\*a</sup>

<sup>a</sup> Department of Physics, Chemistry and Biology, Linköping University, Linköping SE-58183, Sweden.

E-mail: [fengling.zhang@liu.se](mailto:fengling.zhang@liu.se)

<sup>b</sup> Key Lab of Organic Optoelectronics and Molecular Engineering of Ministry of Education, Department of Chemistry, Tsinghua University, Beijing 100084, China.

E-mail: [qjuan@mail.tsinghua.edu.cn](mailto:qjuan@mail.tsinghua.edu.cn),

**Table S1** Photophysical Characteristics of Ir(Ftbpa)<sub>3</sub> and Ir(FOtbp)<sub>3</sub>.

|                              | Degassed CH <sub>2</sub> Cl <sub>2</sub> solution <sup>a</sup>                                          |                                  |                                      |                              |                                                                  | Neat film                        |                                      |                              |                                                                  |
|------------------------------|---------------------------------------------------------------------------------------------------------|----------------------------------|--------------------------------------|------------------------------|------------------------------------------------------------------|----------------------------------|--------------------------------------|------------------------------|------------------------------------------------------------------|
|                              | $\lambda_{\text{abs}}[\text{nm}]$<br>[ $\varepsilon (\times 10^4 \text{ L mol}^{-1} \text{ cm}^{-1})$ ] | $\lambda_{\text{em}}[\text{nm}]$ | $\Phi_{\text{PL}}^{\text{b}}$<br>[%] | $\tau_{\text{p}}[\text{ns}]$ | $K_{\text{r}}/K_{\text{nr}}$<br>[ $\times 10^5 \text{ s}^{-1}$ ] | $\lambda_{\text{em}}[\text{nm}]$ | $\Phi_{\text{PL}}^{\text{b}}$<br>[%] | $\tau_{\text{p}}[\text{ns}]$ | $K_{\text{r}}/K_{\text{nr}}$<br>[ $\times 10^5 \text{ s}^{-1}$ ] |
| <b>Ir(Ftbpa)<sub>3</sub></b> | 263 (12.3), 335 (3.5),<br>355 (3.6), 374 (3.3), 490<br>(2.3), 550 (1.8)                                 | 765,<br>820(s)                   | 14.7                                 | 730                          | 2.0/11.7                                                         | 784                              | 2.6                                  | 19                           | 13.7/512.6                                                       |
| <b>Ir(FOtbp)<sub>3</sub></b> | 260 (10.8), 326 (3.0),<br>349 (2.9), 349 (2.8), 383<br>(2.1), 472 (1.9), 537<br>(1.1)                   | 767,<br>827(s)                   | 10.8                                 | 489                          | 2.2/18.2                                                         | 780                              | 2.4                                  | 50                           | 4.9/199.2                                                        |

<sup>a</sup> The concentration of the solution is  $2 \times 10^{-5}$  M.  $\varepsilon$  denotes the molar extinction coefficients. <sup>b</sup>  $\Phi_{\text{PL}}$  denotes the PLQY.

**Table S2** Summary of photovoltaic parameters of T-OPVs based on Ftbpa and FOtbp ligands.

| Active layer              | $V_{\text{oc}}$ (V) | $J_{\text{sc}}$ (mA/cm <sup>2</sup> ) | FF   | PCE (%) |
|---------------------------|---------------------|---------------------------------------|------|---------|
| Ftbpa:PC <sub>71</sub> BM | 0.27                | 0.02                                  | 0.24 | 0.001   |
| FOtbp:PC <sub>71</sub> BM | 0.45                | 0.04                                  | 0.37 | 0.007   |

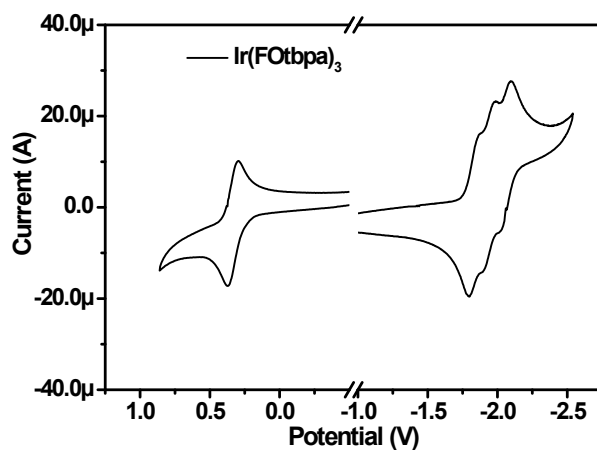

**Fig. S1** CV of and  $\text{Ir}(\text{FOTbpa})_3$  recorded versus  $\text{Fc}^+/\text{Fc}$  in anhydrous DMF solutions at 298 K under a  $\text{N}_2$  atmosphere;

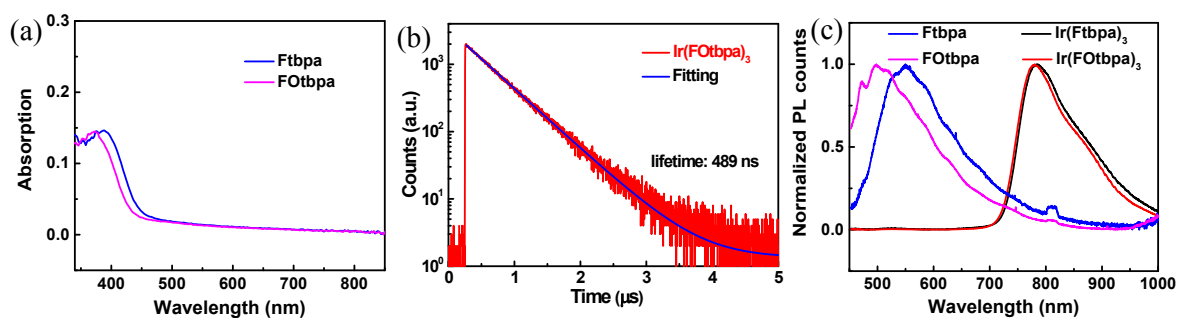

**Fig. S2** (a) Absorption spectra of Ftbpa and FOTbpa films; (b) Transient PL decay curves of  $\text{Ir}(\text{FOTbpa})_3$  in degassed  $\text{CH}_2\text{Cl}_2$  solution; (c) Normalized PL spectra of  $\text{Ir}(\text{Ftbpa})_3$ ,  $\text{Ir}(\text{FOTbpa})_3$ , Ftbpa, and FOTbpa films; The films were excited by a 405 nm laser.

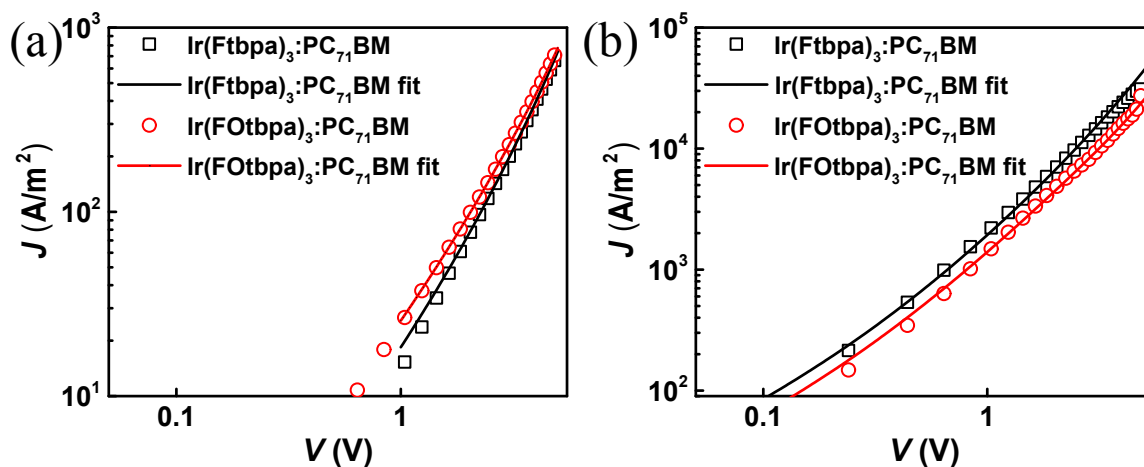

**Fig. S3**  $J$ - $V$  curves for hole (a) and electron (b) only devices based on  $\text{Ir}(\text{Ftbpa})_3:\text{PC}_{71}\text{BM}$  and  $\text{Ir}(\text{FOtbpa})_3:\text{PC}_{71}\text{BM}$  blends with a weight ratio of 1:1.5.

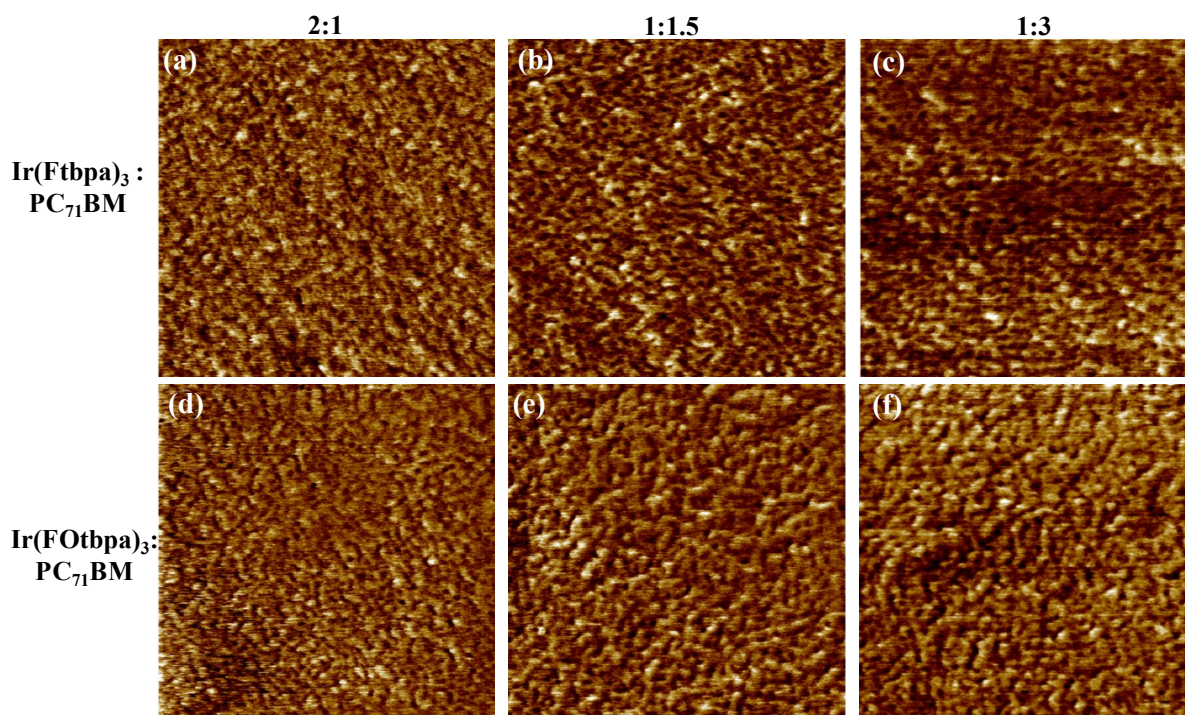

**Fig. S4** AFM ( $2\ \mu\text{m} \times 2\ \mu\text{m}$ ) phase images of  $\text{Ir}(\text{Ftbpa})_3:\text{PC}_{71}\text{BM}$  blends with weight ratio of 2:1 (a), 1:1.5 (b), 1:3 (c) and  $\text{Ir}(\text{FOtbpa})_3:\text{PC}_{71}\text{BM}$  blends with weight ratio of 2:1 (d), 1:1.5 (e), 1:3 (f).

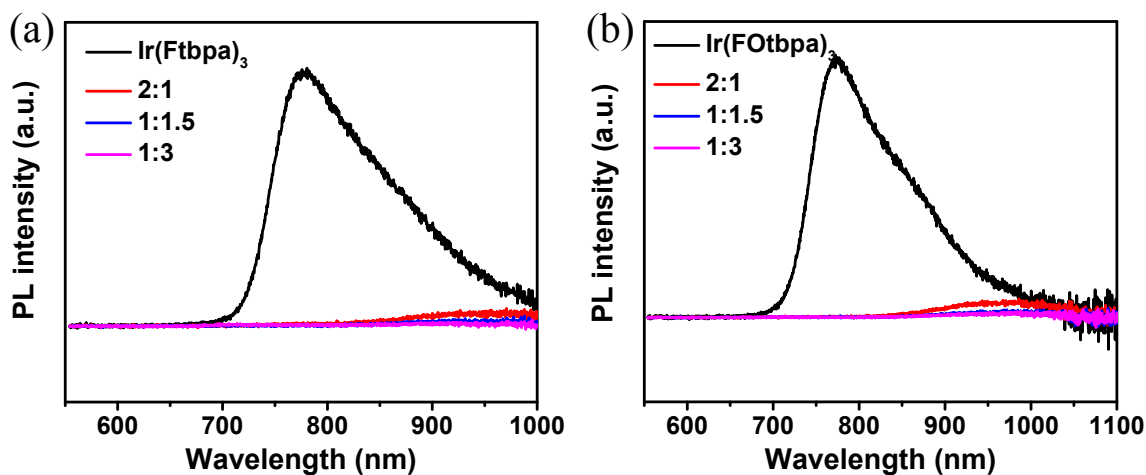

**Fig. S5** (a) PL spectra of the pristine  $\text{Ir}(\text{Ftbpa})_3$  and blended films with different weight ratios. (b) PL spectra of the pristine  $\text{Ir}(\text{FOtbpa})_3$  and blended films with different weight ratios. The PL intensities are corrected by their absorptions at the excitation wavelength (532 nm).

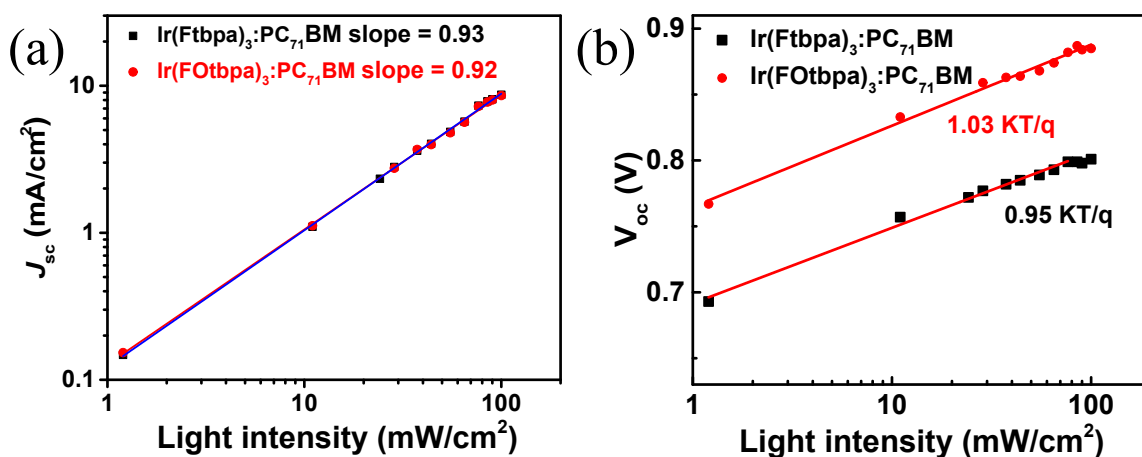

**Fig. S6** (a)  $J_{sc}$  and (b)  $V_{oc}$  versus light intensity for T-OPVs based on  $\text{Ir}(\text{Ftbpa})_3:\text{PC}_{71}\text{BM}$  blends (1:1.5) and  $\text{Ir}(\text{FOtbpa})_3:\text{PC}_{71}\text{BM}$  blends (1:1.5).
